# Supplementary material for: Structural diversity through ligand flexibility: two novel metal–organic nets via ligand-to-ligand cross-linking of “paddlewheels”
Source: Royal Society of Chemistry journal article supplement (doi:10.1039/c0cc03270k), 2010-01-01

## Supplemental Information

### Structural Diversity through Ligand Flexibility: Two Novel Metal-Organic Nets *via* Ligand-to-Ligand Cross-Linking of “Paddlewheels”

Wenge Qiu,<sup>a,b</sup> Jason A. Perman,<sup>a</sup> Łukasz Wojtas,<sup>a</sup> Mohamed Eddaoudi and Michael J. Zaworotko<sup>\*a</sup>

#### Experimental Sections

The X-ray diffraction data were collected using Bruker-AXS SMART-APEXII CCD diffractometer (CuK $\alpha$ ,  $\lambda = 1.54178 \text{ \AA}$ ). Indexing was performed using APEX2<sup>1</sup> (Difference Vectors method). Data integration and reduction were performed using SaintPlus 6.01.<sup>2</sup> Absorption correction was performed by multi-scan method implemented in SADABS.<sup>3</sup> Space groups were determined using XPREP implemented in APEX2.<sup>1</sup> The structure was solved using SHELXS-97 and refined using SHELXL-97 contained in APEX2<sup>1</sup> and WinGX v1.70.01<sup>4,5,6</sup> programs packages. Hydrogen atoms were placed in geometrically calculated positions or found in the Fourier difference map and included in the refinement process using riding model. The crystal **2** was a racemic twin (two crystals were checked). Crystal structure of **1** was refined by using restraints and with isotropic displacement parameters for sixteen atoms. Low angle diffraction only (Theta = 50.43 deg) and significant disorder of the ligand was observed in this case. For both structures the contribution of disordered solvent molecules was treated as a diffuse using Squeeze procedure implemented in Platon program.<sup>7,8</sup>

All the reagents and solvents, unless described otherwise, were commercially available and used as received. <sup>1</sup>H-NMR data were collected on a Bruker DRX 250-MHz spectrometer. FT-IR data were recorded on a Nicolet AVATAR 320 FT-IR instrument. Thermogravimetric analysis (TGA) was performed on a Perkin Elmer STA6000 instrument under nitrogen

atmosphere (20mL/min). The sample was heated at a constant rate of 10°C/min from 30°C to 800°C. Powder X-ray diffraction was performed on a Bruker D8 Advance,  $\theta/2\theta$  diffractometer using Cu- $K\alpha$  radiation ( $\lambda=1.54178\text{\AA}$ ) at room temperature. The experimental parameters included a scan speed of 3°/h and a step size of 0.05° with respect to  $2\theta$ . The data was collected over the range of 3-40° with respect to  $2\theta$  and was analyzed using the EVA software suite.

## References

- 1 Bruker (2008). *APEX2* (Version 2008.1-0). Bruker AXS Inc., Madison, Wisconsin, USA.
- 2 Bruker (2001b). SAINT-V6.28A. Data Reduction Software.
- 3 G. M. Sheldrick, (1996). *SADABS. Program for Empirical Absorption Correction*. University of Gottingen, Germany.
- 4 L. J. Farrugia, *J. Appl. Cryst.*, 1999, **32**, 837.
- 5 G.M. Sheldrick, (1997) SHELXL-97. Program for the Refinement of Crystal.
- 6 G.M. Sheldrick, *Acta Cryst.* 1990, **A46**, 467.
- 7 T. L. Spek, *Acta Cryst.*, 1990, **A46**, 194.
- 8 T. L. Spek, *Acta Cryst.*, 1990, **A46**, c34.

**Table S1.** Crystal data and structure refinement for complex **1** and **2**.

|                                 | Complex 1                                                                    | Complex 2                                                           |
|---------------------------------|------------------------------------------------------------------------------|---------------------------------------------------------------------|
| Empirical formula               | C <sub>62</sub> H <sub>51</sub> Cu <sub>6</sub> NO <sub>35</sub>             | C <sub>57</sub> H <sub>48</sub> Cu <sub>6</sub> O <sub>36</sub>     |
| Formula weight                  | 1751.28                                                                      | 1690.19                                                             |
| Temperature                     | 100(2)K                                                                      | 100(2)K                                                             |
| Crystal System                  | Orthorhombic                                                                 | Hexagonal                                                           |
| Space Group                     | Pnma                                                                         | P6 <sub>3</sub> 22                                                  |
| Unit Cell Dimensions            | a = 34.3624(13) Å<br>b = 18.6807(7) Å<br>c = 25.8757(9) Å<br>α = β = γ = 90° | a = b = 18.5773(3) Å<br>c = 22.6933(5) Å<br>α = β = 90°<br>γ = 120° |
| Volume                          | 16610.0(11) Å <sup>3</sup>                                                   | 6782.6(2) Å <sup>3</sup>                                            |
| Z                               | 4                                                                            | 2                                                                   |
| Density                         | 0.700 Mg/m <sup>3</sup>                                                      | 0.828 Mg/m <sup>3</sup>                                             |
| Absorption coefficient          | 1.186 mm <sup>-1</sup>                                                       | 1.443 mm <sup>-1</sup>                                              |
| F(000)                          | 3536                                                                         | 1704                                                                |
| Crystal Size                    | 0.15 × 0.10 × 0.07 mm                                                        | 0.20 × 0.15 × 0.04 mm                                               |
| Theta range for data collection | 2.14 to 50.43 deg.                                                           | 2.75 to 67.08 deg.                                                  |
| Reflections collected           | 31349                                                                        | 49779                                                               |
| Independent reflections         | 9036 [R(int) = 0.0728]                                                       | 4033 [R(int) = 0.1095]                                              |
| Absorption correction           | Semi-empirical from<br>equivalents                                           | Semi-empirical from<br>equivalents                                  |
| Refinement method               | Full-matrix least-squares on F <sup>2</sup>                                  | Full-matrix least-squares on F <sup>2</sup>                         |
| Max. and min. transmission      | 0.9216 and 0.8422                                                            | 0.9446 and 0.7613                                                   |
| Data / restraints / parameters  | 9036 / 86 / 398                                                              | 4033 / 0 / 150                                                      |
| GOF on F <sup>2</sup>           | 1.090                                                                        | 0.985                                                               |
| Final R indices [I > 2σ(I)]     | R <sub>1</sub> = 0.0881, wR <sub>2</sub> = 0.2230                            | R <sub>1</sub> = 0.0328, wR <sub>2</sub> = 0.0775                   |
| R indices (all data)            | R <sub>1</sub> = 0.1447, wR <sub>2</sub> = 0.2456                            | R <sub>1</sub> = 0.0398, wR <sub>2</sub> = 0.0798                   |
| Largest diff. peak and hole     | 0.546 / -0.550 e Å <sup>-3</sup>                                             | 0.186 / -0.310 e. Å <sup>-3</sup>                                   |

## Additional Figures

**Figure S1.** Experimental and calculated X-ray diffraction patterns for complex **1**, indicating the phase purity of the as-synthesized product.

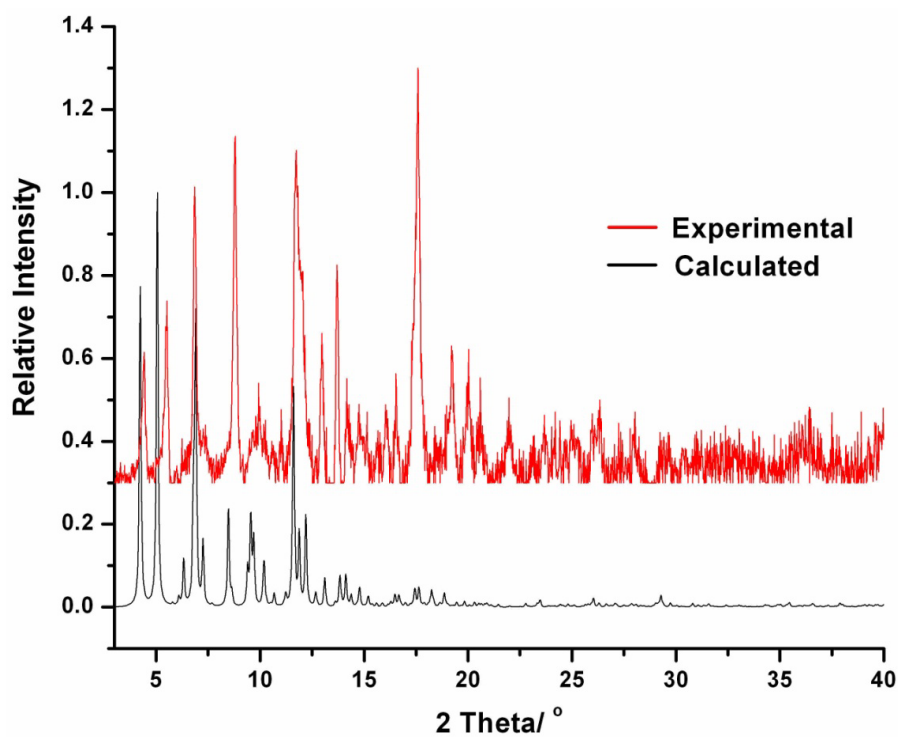

**Figure S2.** Two kinds of conformation of the ligand **L** in **1**: **La** (left) and **Lb** (right).

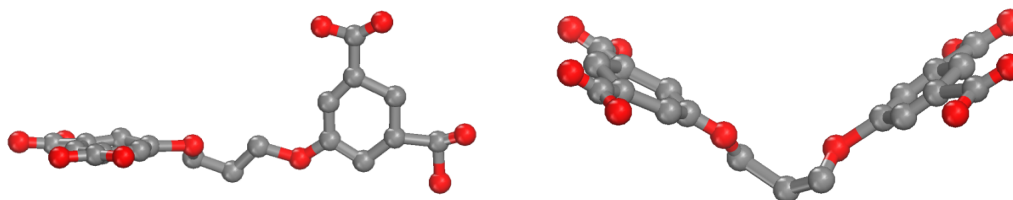

**Figure S3.** The cavities in **1** viewed along *a*-axis.

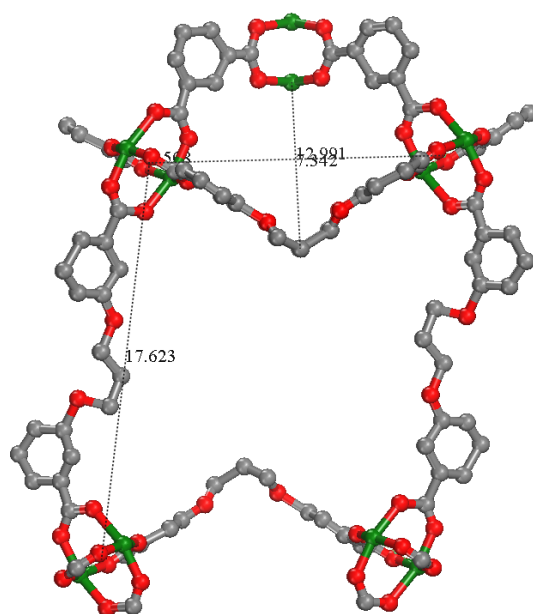

**Figure S4.** Framework structure of compound **1** viewed down the *c* axis, showing the Kagomé like layers. **L** ligands span the hexagonal windows.

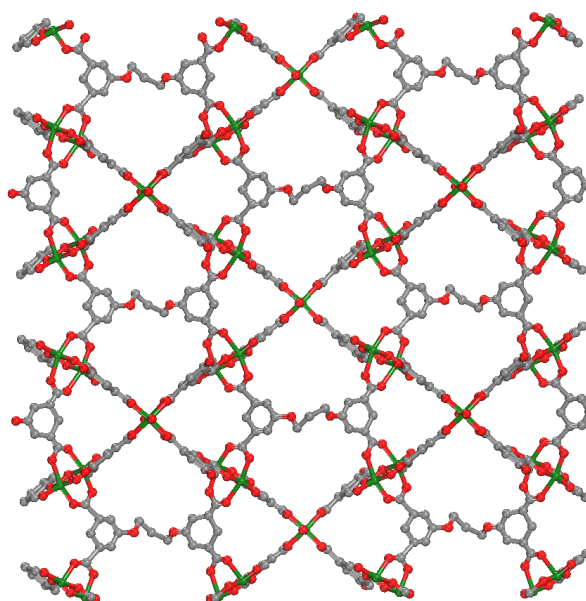

**Figure S5.** Framework structure of compound **1** viewed down the *b* axis.

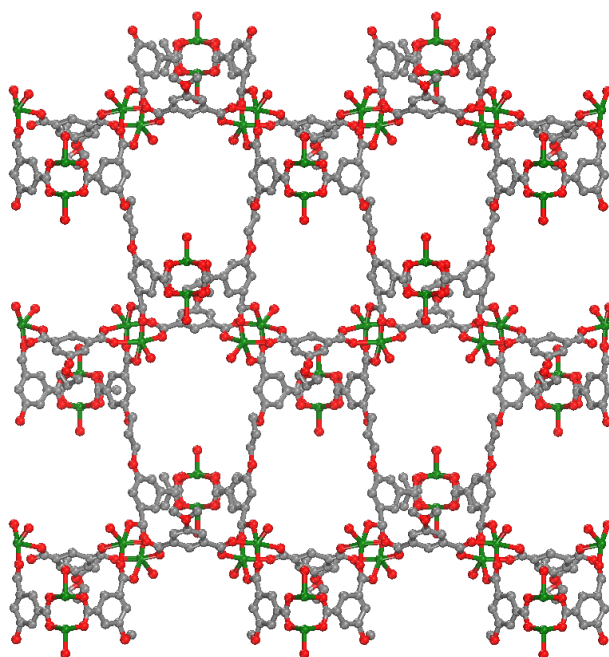

**Figure S6** TGA data and analysis for complex **1**.

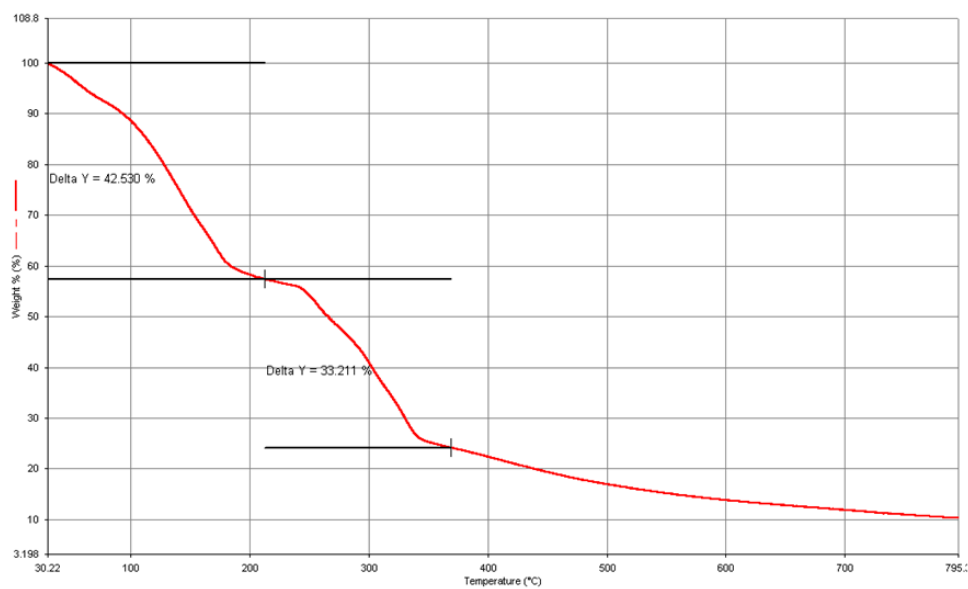

**Fig. S7.** Crystal shapes of **1** (left) and **2** (right).

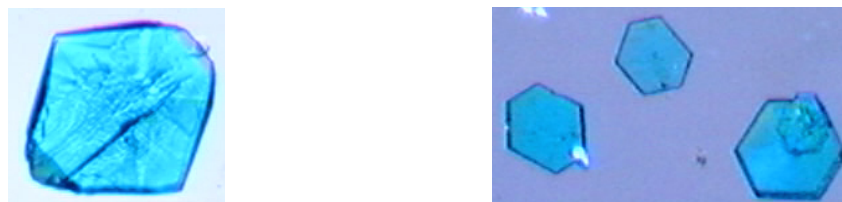

**Figure S8.** Experimental and calculated X-ray diffraction patterns for compound **2**, indicating the phase purity of the as-synthesized product.

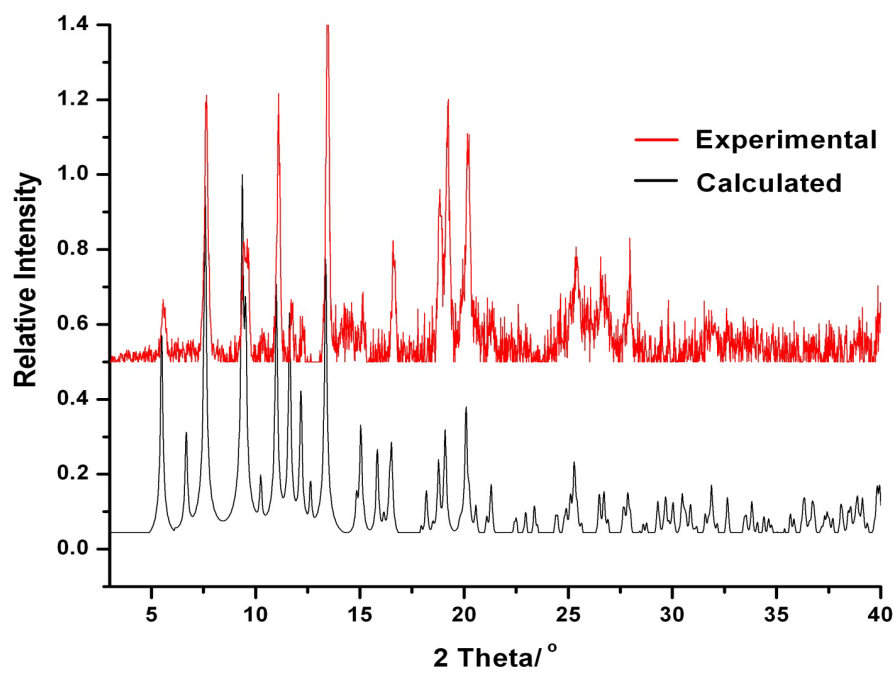

**Figure S9.** One trigonal prism connected with six trigonal prismatic units through its vertices to afford the *acs*-like topology.

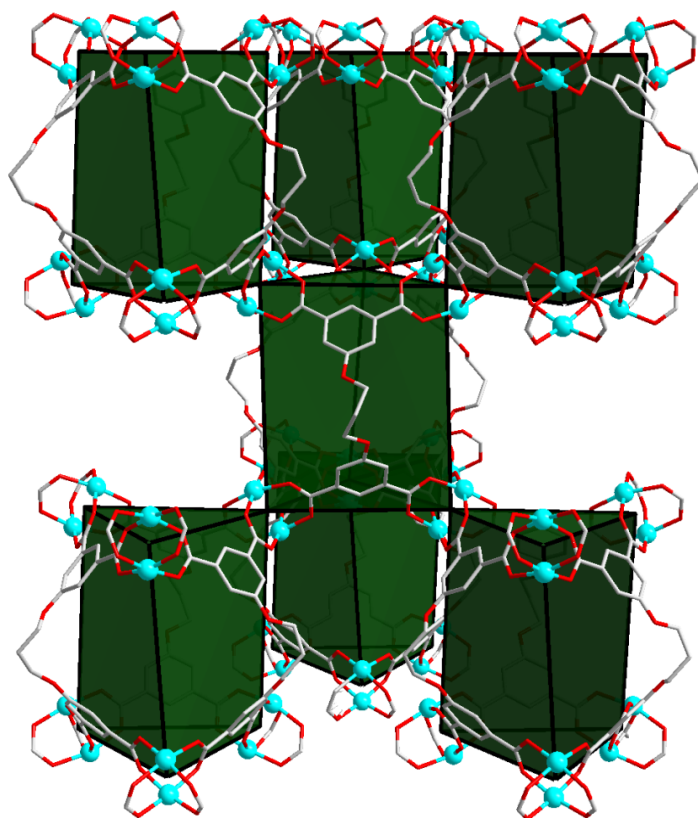



**Figure S10.** Space filling model of compound **2** viewed down the *c* axis.

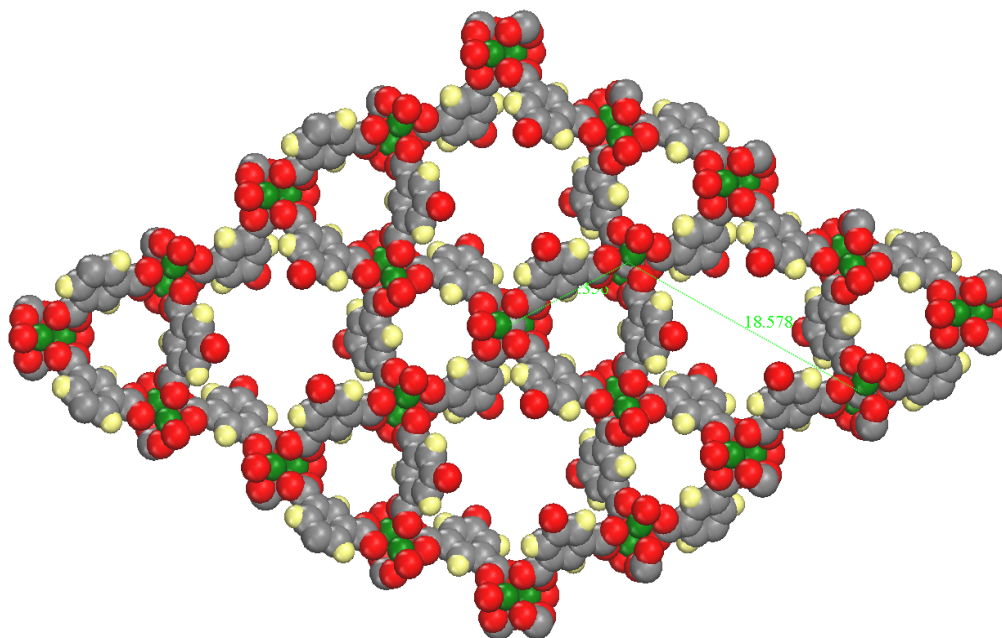

**Figure S11.** Framework structure of compound **2** viewed down the *b* axis.

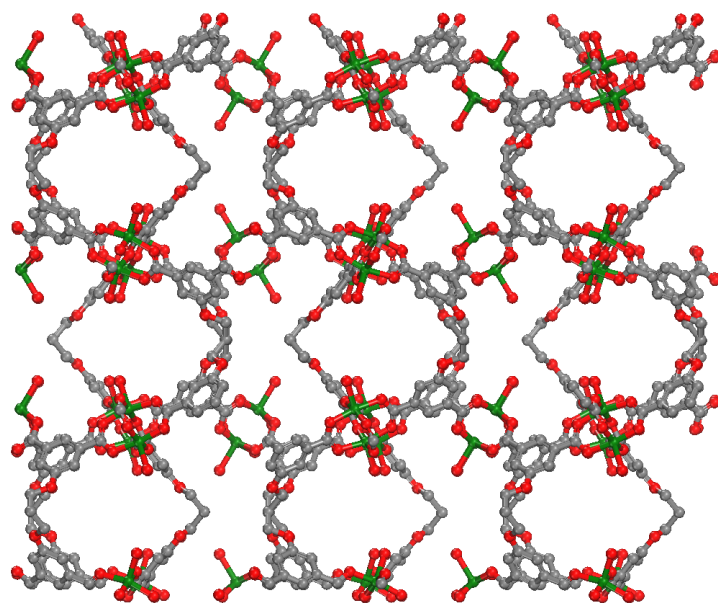

Supplement: c0cc03270k.pdf [file c0cc03270k.pdf]
